# Supplementary material for: Waterborne polyacrylates with thermally activated delayed fluorescence and two-state phosphorescence
Source: Royal Society of Chemistry journal article supplement (doi:10.1039/c7qm00399d), 2018-01-01
Supplement: c7qm00399d1.pdf [file c7qm00399d1.pdf]

*Electronic Supplementary Information for:*

# Dual-emissive waterborne polyacrylates: thermally-activated delayed fluorescence and room-temperature phosphorescence

Tao Wang,<sup>a,b</sup> Zhen Tang,<sup>c</sup> Dong Xu,<sup>a</sup> Wei Sun,<sup>a</sup> Yipeng Deng,<sup>a</sup> Qidong Wang,<sup>a</sup> Xingyuan Zhang,<sup>\*a</sup> Peifeng Su,<sup>\*c</sup> Guoqing Zhang<sup>\*b</sup>

<sup>a</sup>Department of Polymer Science and Engineering, University of Science and Technology of China, Hefei, China 230026. E-mail: zxy@ustc.edu.cn

<sup>b</sup>Hefei National Laboratory for Physical Sciences at the Micro Scale, University of Science and Technology of China, Hefei, China 230026. E-mail: gzhang@ustc.edu.cn

<sup>c</sup>The State Key Laboratory of Physical Chemistry of Solid Surfaces, and College of Chemistry and Chemical Engineering, Xiamen University, Xiamen, Fujian 5, China, 36100 Email: sup@xmu.edu.cn

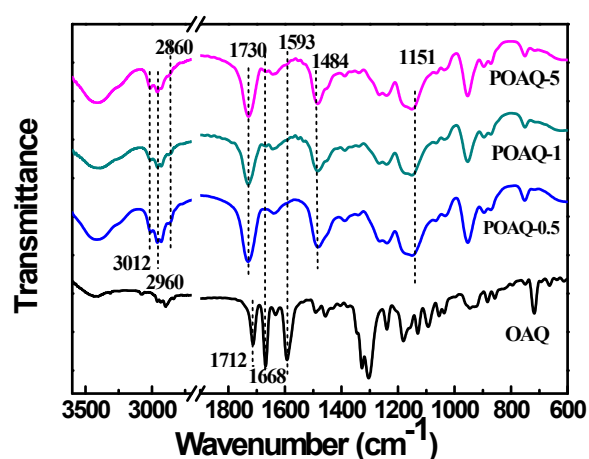

**Fig. S1.** FT-IR of POAQ films with various NAQ weight percentages on KBr plate (number denotes the weight percentage of OAQ, e.g. 0.5 % OAQ = POAQ-0.5. Control represents polyacrylate without OAQ).

**Table S1** The specific ratio of each component in PNAQ

| Sample  | NAQ<br>(wt%) <sup>a</sup> | DMC:BMA<br>(mass ratio) <sup>b</sup> | AIBI<br>(wt%) <sup>c</sup> | NDM<br>(wt%) <sup>d</sup> | Solid Content<br>(wt%) <sup>e</sup> |
|---------|---------------------------|--------------------------------------|----------------------------|---------------------------|-------------------------------------|
| PNAQ0.5 | 0.5                       | 5:1                                  | 1                          | 4                         | 30                                  |
| PNAQ1   | 1                         | 5:1                                  | 1                          | 4                         | 30                                  |
| PNAQ5   | 5                         | 5:1                                  | 1                          | 4                         | 30                                  |

<sup>a</sup>the weight percentage of NAQ in waterborne polyacrylate; <sup>b</sup>the mass ratio of DMC and BMA; <sup>c</sup>the weight percentage of AIBI; <sup>d</sup>the weight percentage of NDM; <sup>e</sup>the weight percentage of solid content in emulsion.

**Table S2** The specific ratio of each component in POAQ

| Sample  | OAQ<br>(wt%) <sup>a</sup> | DMC:BMA<br>(mass ratio) <sup>b</sup> | AIBI<br>(wt%) <sup>c</sup> | NDM<br>(wt%) <sup>d</sup> | Solid Content<br>(wt%) <sup>e</sup> |
|---------|---------------------------|--------------------------------------|----------------------------|---------------------------|-------------------------------------|
| POAQ0.5 | 0.5                       | 5:1                                  | 1                          | 4                         | 30                                  |
| POAQ1   | 1                         | 5:1                                  | 1                          | 4                         | 30                                  |
| POAQ5   | 5                         | 5:1                                  | 1                          | 4                         | 30                                  |

<sup>a</sup>the weight percentage of OAQ in waterborne polyacrylate; <sup>b</sup>the mass ratio of DMC and BMA; <sup>c</sup>the weight percentage of AIBI; <sup>d</sup>the weight percentage of NDM; <sup>e</sup>the weight percentage of solid content in emulsion.

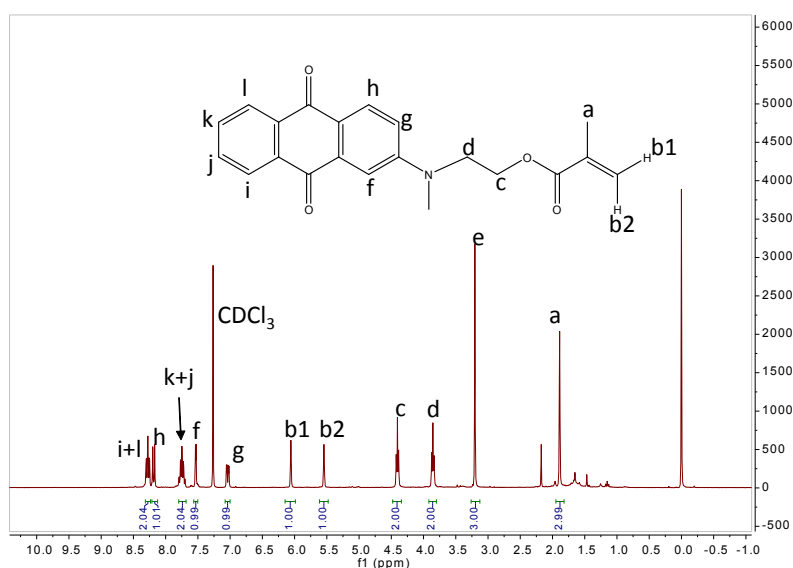**Fig. S2.** <sup>1</sup>H NMR spectrum of Synthesis of 2-methyl-acrylic acid 2-[(9,10-dioxo-9,10-dihydro-anthracen-2-yl)-methyl-amino]-ethyl ester (NAQ)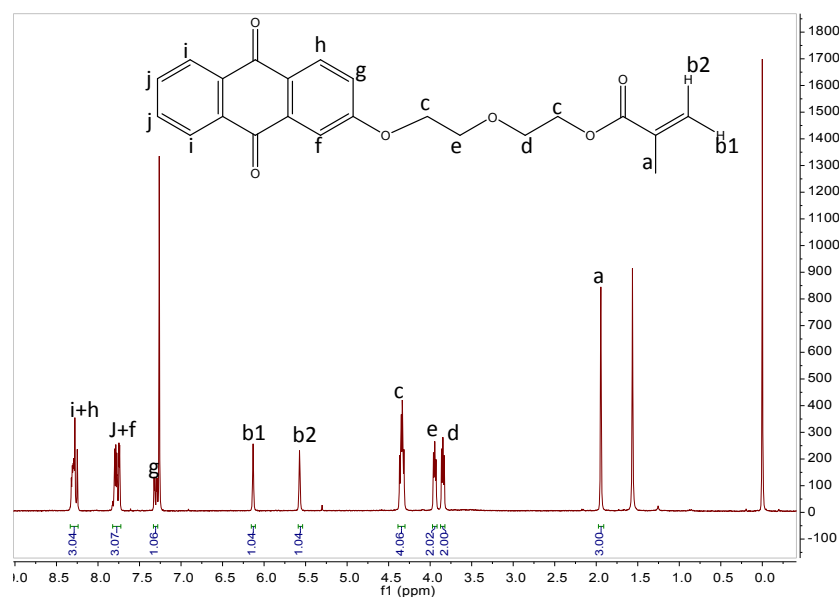**Fig. S3.** <sup>1</sup>H NMR spectrum of Synthesis of 2-{2-[(9,10-dioxo-9,10-dihydroanthracen-2-yl)oxy]ethoxy}ethyl methacrylate (OAQ)

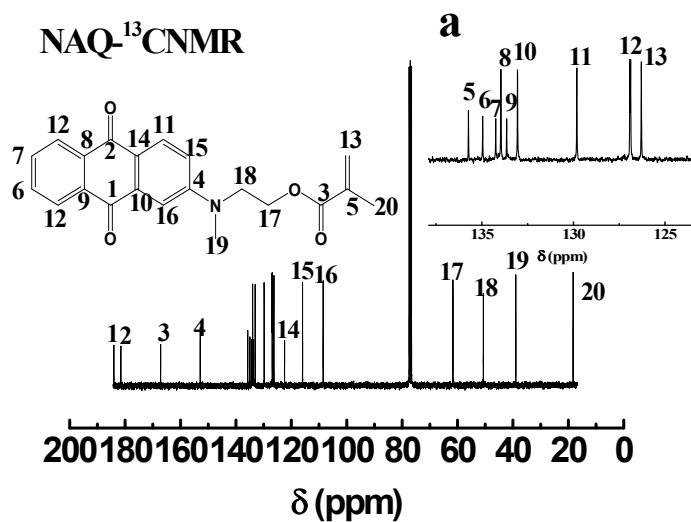

**Fig. S4.** <sup>1</sup>H NMR spectrum of 2-methyl-acrylic acid 2-[(9,10-dioxo-9,10-dihydro-anthracen-2-yl)-methyl-amino]-ethyl ester (NAQ)

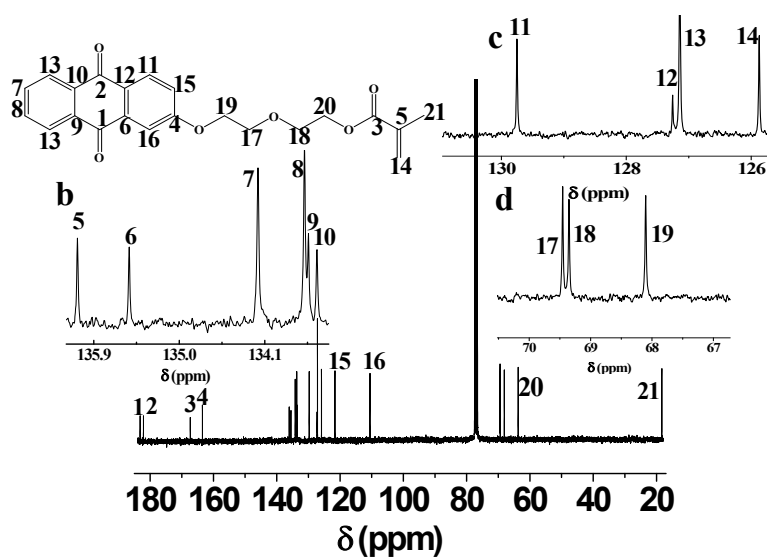

**Fig. S5.** <sup>13</sup>C NMR spectrum of 2-{2-[(9, 10-dioxo-9, 10-dihydroanthracen-2-yl)oxy]ethoxy}ethyl methacrylate (OAQ)

20160112\_APCI+AC-XD-01 #6 RT: 0.08 AV: 1 NL: 1.25E8  
T: FTMS + c APCI corona Full ms [100.00-1000.00]

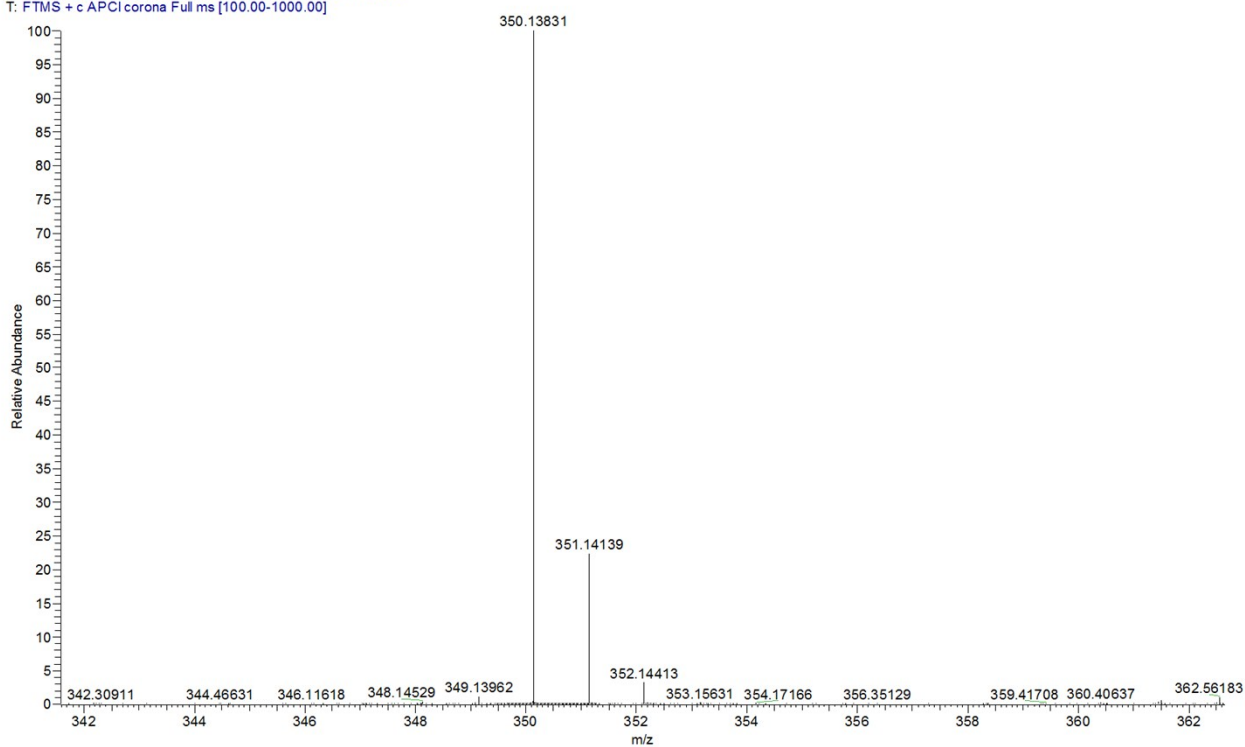

| m/z       | Intensity | Relative | Theo. Mass | Delta (mmu) | RDB equiv. | Composition  |
|-----------|-----------|----------|------------|-------------|------------|--------------|
| 350.13831 | 125227072 | 100      | 350.13868  | -0.38       | 12.5       | C21 H20 O4 N |

**Fig. S6.** MALDI-TOF-MS spectrum of 2-methyl-acrylic acid 2-[(9,10-dioxo-9,10-dihydro-anthracen-2-yl)-methyl-amino]-ethyl ester (NAQ).

20160303\_APCI+XD-AOAG #6 RT: 0.07 AV: 1 NL: 6.07E7  
T: FTMS + c APCI corona Full ms [100.00-600.00]

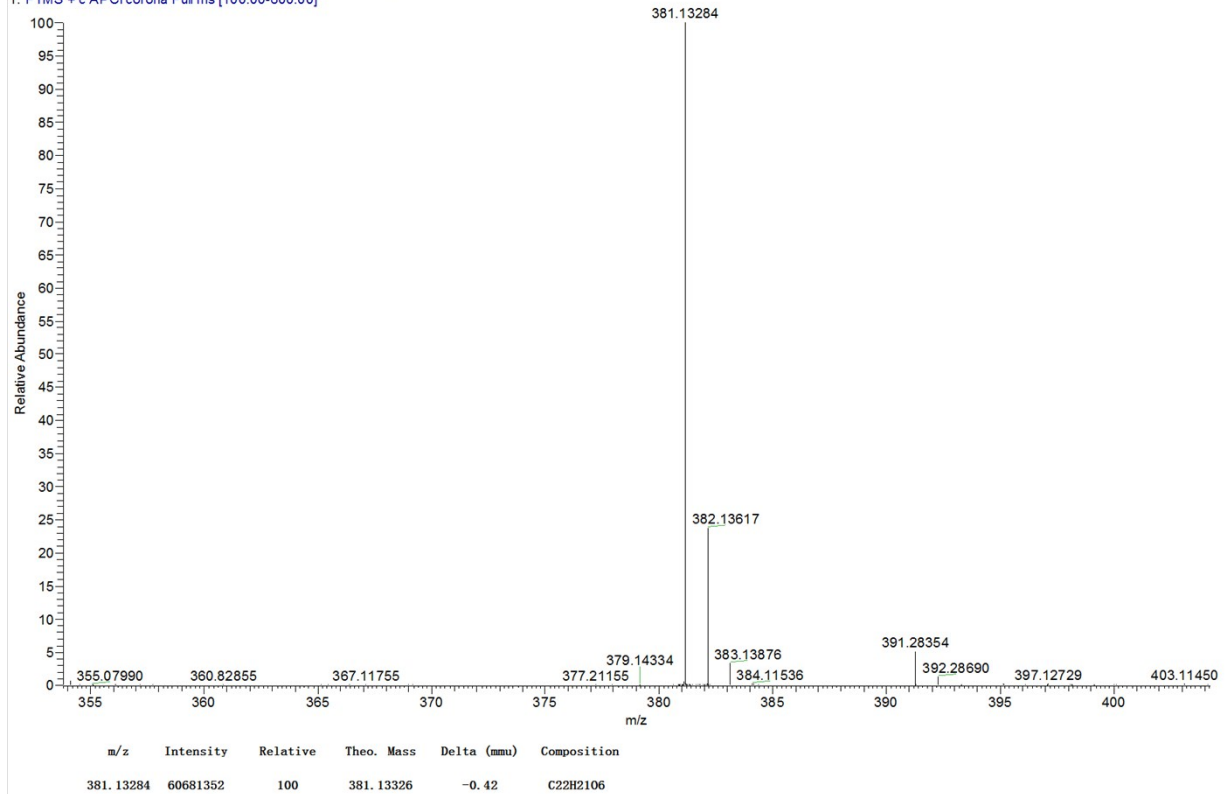

**Fig. S7.** MALDI-TOF-MS spectrum of 2-{2-[(9, 10-dioxo-9, 10-dihydroanthracen-2-yl)oxy]ethoxy}ethyl methacrylate (OAQ)
